# Supplementary material for: Regulation of the perilymphatic–endolymphatic water shunt in the cochlea by membrane translocation of aquaporin-5
Source: PubMed Central journal article supplement (PMC4646919; doi:10.1007/s00424-015-1720-6), 2015-07-25
Supplement: 424_2015_1720_MOESM8_ESM.pdf [file 424_2015_1720_MOESM8_ESM.pdf]

| Experimental group name    | Perilymphatic perfusate osmolarity | M3 agonist/antagonist (conc.)                      | Number of cochlear specimens analyzed (n) |
|----------------------------|------------------------------------|----------------------------------------------------|-------------------------------------------|
| hyposmolarity              | 200 mOsm/L                         | -                                                  | 3                                         |
| hyperosmolarity            | 400 mOsm/L                         | -                                                  | 3                                         |
| isoosmolarity (control)    | 285 mOsm/L                         | -                                                  | 3                                         |
| pilocarpine                | 285 mOsm/L                         | Pilocarpine (10 $\mu$ M)                           | 3                                         |
| pilocarpine + atropine     | 285 mOsm/L                         | Pilocarpine (10 $\mu$ M)<br>Atropine (100 $\mu$ M) | 3                                         |
| hyperosmolarity + atropine | 400 mOsm/L                         | Atropine (100 $\mu$ M)                             | 3                                         |
