# Supplementary material for: Regulation of the perilymphatic–endolymphatic water shunt in the cochlea by membrane translocation of aquaporin-5
Source: PubMed Central journal article supplement (PMC4646919; doi:10.1007/s00424-015-1720-6), 2015-07-25
Supplement: 424_2015_1720_MOESM9_ESM.pdf [file 424_2015_1720_MOESM9_ESM.pdf]

| <b>Experimental group name</b> | <b>Pre-incubation media (conc., time)</b> | <b>Incubation media (conc., time)</b>     | <b>Number of cochlear specimens analyzed (n)</b> |
|--------------------------------|-------------------------------------------|-------------------------------------------|--------------------------------------------------|
| M3-633-AN                      | DMSO<br>(0.1%, 10 min)                    | M3-633-AN in 0.1% DMSO<br>(100nM, 20 min) | 3                                                |
| 4-DAMP                         | 4-DAMP<br>(10 $\mu$ M, 10 min)            | M3-633-AN in 0.1% DMSO<br>(100nM, 20 min) | 3                                                |
| DMSO (control)                 | DMSO<br>(0.1%, 10 min)                    | DMSO<br>(0.1%, 20 min)                    | 3                                                |
