# Supplementary material for: Regulation of the perilymphatic–endolymphatic water shunt in the cochlea by membrane translocation of aquaporin-5
Source: PubMed Central journal article supplement (PMC4646919; doi:10.1007/s00424-015-1720-6), 2015-07-25
Supplement: 424_2015_1720_MOESM10_ESM.pdf [file 424_2015_1720_MOESM10_ESM.pdf]

| Target | Tissue sample | Mean    | 95% CI low | 95% CI high | n |
|--------|---------------|---------|------------|-------------|---|
| Chrm3  |               |         |            |             |   |
|        | SL            | 1,1919  | 0,77       | 1,618       | 4 |
|        | SV            | 0,683   | 0,38       | 0,981       | 4 |
|        | OC            | 8,0517  | 4,78       | 11,323      | 4 |
|        | AN            | 21,4187 | 2,06       | 40,778      | 4 |
|        | SG            | 5,9928  | 2,06       | 9,927       | 3 |
|        | SC            | 38,8722 | 19,29      | 58,456      | 1 |
|        | SI            | 6,0927  | -0,74      | 12,926      | 1 |
|        |               |         |            |             |   |

| Target | Efficiency | Error | Comparison | Difference | 95% CI low | 95% CI high | p-Value | significant |
|--------|------------|-------|------------|------------|------------|-------------|---------|-------------|
| Chrm3  | 2,31E-001  | 1,703 |            |            |            |             |         |             |
|        |            |       | SL/AN      | 20,22681   | 8,8382     | 31,61542    | <.0001  | Yes         |
|        |            |       | SL/OC      | 6,85983    | -4,5288    | 18,24843    | <.0001  | Yes         |
|        |            |       | SL/SC      | 37,68024   | 19,6733    | 55,68721    | <.0001  | Yes         |
|        |            |       | SL/SG      | 4,80087    | -7,5002    | 17,10197    | 0,0046  | Yes         |
|        |            |       | SL/SI      | 4,90079    | -13,1062   | 22,90776    | 0,0076  | Yes         |
|        |            |       | SL/SV      | 0,50891    | -10,8797   | 11,89752    | 0,0857  | No          |
|        |            |       |            |            |            |             |         |             |

| Reference | Efficiency | Error |
|-----------|------------|-------|
| Tpp       | 1,843      | 0,008 |
| Ubc       | 1,900      | 0,014 |
| Actb      | 1,981      | 0,015 |
